# Supplementary material for: Analysis of the impact of the absence of RAD51 strand exchange activity in Arabidopsis meiosis
Source: PubMed Central journal article supplement (PMC5552350; doi:10.1371/journal.pone.0183006), 2017-08-10
Supplement: pone.0183006.s001.pdf [file pone.0183006.s001.pdf]

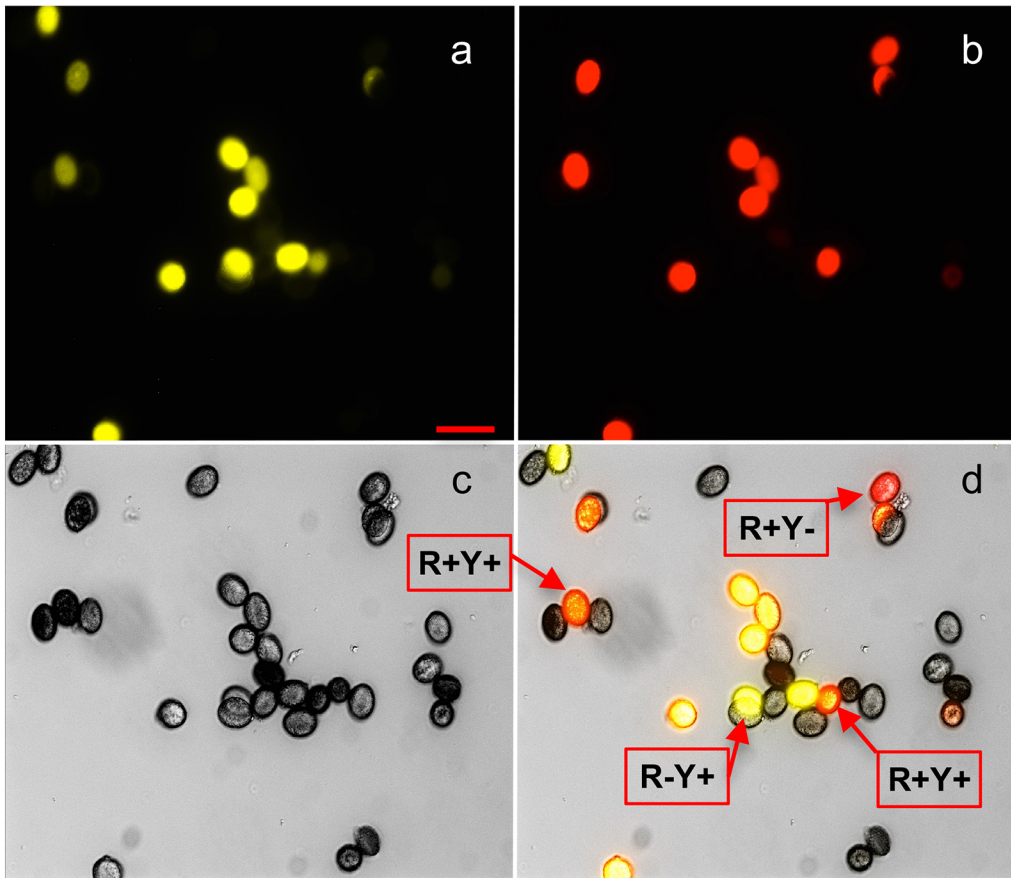

Supporting Figure 1. YFP (a), RFP (b), bright-field and merged (d) images of pollen from CEN3xCol0 F1 plants carrying the fluorescent markers. Examples of the different combinations of fluorescence are arrowed. Scale bar is 5 $\mu$ m.
